# Supplementary material for: Daily Patterns of Preschoolers’ Objectively Measured Step Counts in Six European Countries: Cross-Sectional Results from the ToyBox-Study
Source: MDPI journal article supplement (doi:10.3390/ijerph15020291), 2018-02-07
Supplement: s1 [file s1]

|                                              | <b>Belgium</b> | <b>Bulgaria</b> | <b>Germany</b> | <b>Greece</b> | <b>Poland</b> | <b>Spain</b> |
|----------------------------------------------|----------------|-----------------|----------------|---------------|---------------|--------------|
|                                              | n = 806        | n = 470         | n = 449        | n = 575       | n = 1,192     | n = 553      |
| <b>Meeting PA-guidelines<sub>1</sub> (%)</b> |                |                 |                |               |               |              |
| <b>Weekday</b>                               | 40.0           | 29.3            | 49.9           | 26.5          | 43.2          | 60.7         |
|                                              | c,d,e,g        | b,d,f,g         | a              | ,d,f,g        | c,d,e,g       | a            |
| <b>Weekend day</b>                           | 20.5           | 29.2            | 31.4           | 20.3          | 41.8          | 37.0         |
|                                              | c,d,f,g        | b,e,f,g         | b,e,f,g        | c,d,f,g       | a             | a            |

1 PA = Physical Activity; SE = Standard Error;

2 a significantly different from the other countries;

3 b significantly different Belgium;

4 c significantly different from Bulgaria;

5 d significantly different from Germany;

6 e significantly different from Greece;

7 f significantly different from Poland;

8 g significantly different from Spain;

9 <sub>1</sub> 11,500 steps per day

10
