# Supplementary material for: Daily Patterns of Preschoolers’ Objectively Measured Step Counts in Six European Countries: Cross-Sectional Results from the ToyBox-Study
Source: MDPI journal article supplement (doi:10.3390/ijerph15020291), 2018-02-07
Supplement: s1 [file s1]

## **Belgium**

---

|                   |                      |
|-------------------|----------------------|
| 08 AM - 08:30 AM  | Start preschool      |
| 08:30 AM - 10 AM  | Classroom activities |
| 10 AM - 10:30 AM  | Morning recess       |
| 10:30 AM - 12 PM  | Classroom activities |
| 12 PM - 1:30 PM   | Lunch break+ recess  |
| 1:30 PM - 2:30 PM | Afternoon recess     |
| 2:30 PM - 3:30 PM | Classroom activities |
| 3:30 PM - 4:30 PM | End hour preschool   |

## **Bulgaria**

---

|                |                                              |
|----------------|----------------------------------------------|
| 8 AM - 9 AM    | Start kindergarten                           |
| 9 AM - 10 AM   | Breakfast                                    |
| 10 AM - 11 AM  | Classroom activities, midmorning fruit snack |
| 11 AM - 12 PM  | Recess                                       |
| 12 PM - 1 PM   | Lunch break                                  |
| 1 PM - 4 PM    | Afternoon sleep / Free play time             |
| 4 PM - 5:30 PM | End hour kindergarten                        |

## **Germany (Differs across preschools, example of one kindergarten)**

---

|                   |                                                                      |
|-------------------|----------------------------------------------------------------------|
| 7 AM - 8 AM       | Start kindergarten                                                   |
| 8 AM - 9 AM       | Breakfast                                                            |
| 9 AM - 11 AM      | Free play time/Classroom activities                                  |
| 11 AM - 12 PM     | Recess                                                               |
| 12 PM - 1 PM      | Lunch break                                                          |
| 1:30 PM - 2:30 PM | Afternoon sleep period, classroom activities (quiet play activities) |

|                   |                                |
|-------------------|--------------------------------|
| 2:30 PM - 3:30 PM | Free play time                 |
| 3:30 PM - 4:00 PM | Snacktime                      |
| 4:00 PM - 5:30 PM | Playtime/End hour kindergarten |

### **Greece**

---

|                     |                                            |
|---------------------|--------------------------------------------|
| 8 AM - 9 AM         | Start childcare centers and preschools     |
| 9 AM - 10:30 AM     | Classroom activities                       |
| 10:30 AM - 11:15 AM | Break to eat and recess                    |
| 11:45 AM - 12:15 PM | Prepare to leave from kindergarten         |
| 1:45 PM - 2:30 PM   | Afternoon sleep period                     |
| 2:30 PM - 3:15 PM   | Classroom activities                       |
| 3:45 PM - 4 PM      | End hour childcare centers and preschools. |

### **Poland**

---

|               |                       |
|---------------|-----------------------|
| 8 AM - 9 AM   | Start kindergarten    |
| 9 AM - 11 AM  | Classroom activities  |
| 11 AM - 12 PM | Recess                |
| 12 PM - 1 PM  | Lunch break           |
| 1 PM - 2 PM   | Afternoon sleep       |
| 2 PM - 3 PM   | Free play time        |
| 3 PM - 4 PM   | End hour kindergarten |

### **Spain**

---

|               |                                              |
|---------------|----------------------------------------------|
| 8 AM - 9 AM   | Start preschools                             |
| 9 AM - 10 AM  | Classroom activities (quiet play activities) |
| 10 AM - 11 AM | Break                                        |
| 11 AM - 1 PM  | Classroom activities                         |

1 PM - 3 PM

Lunch + recess

3 PM - 4:30 PM

Classroom activities (quiet play activities)

4:30 PM - 5 PM

End hour preschool (preschoolers go home or  
participate in extracurricular activities)
